# Supplementary material
Source: PubMed Central journal article supplement (PMC3402601)

**A**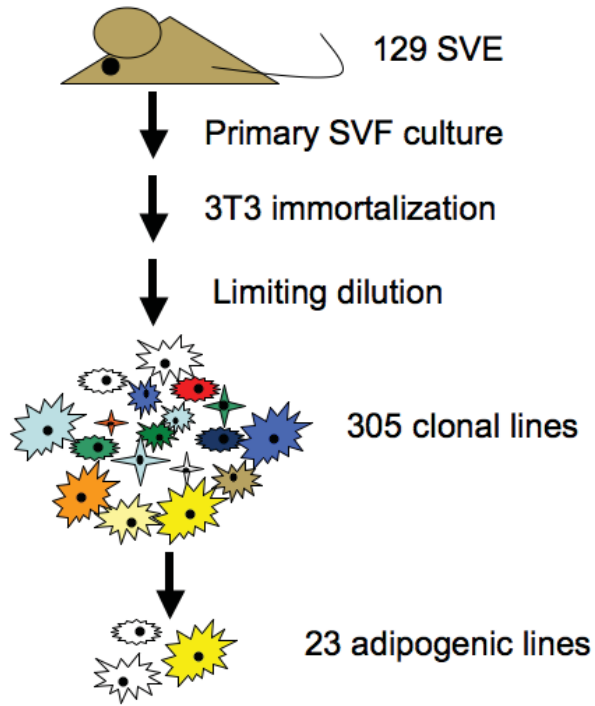**B**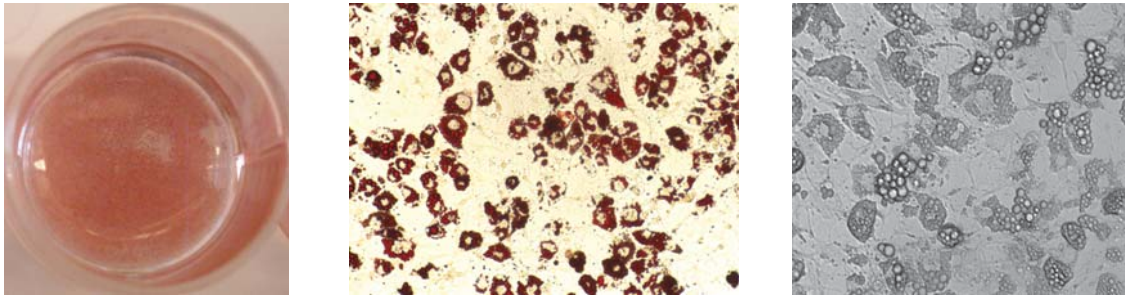**C**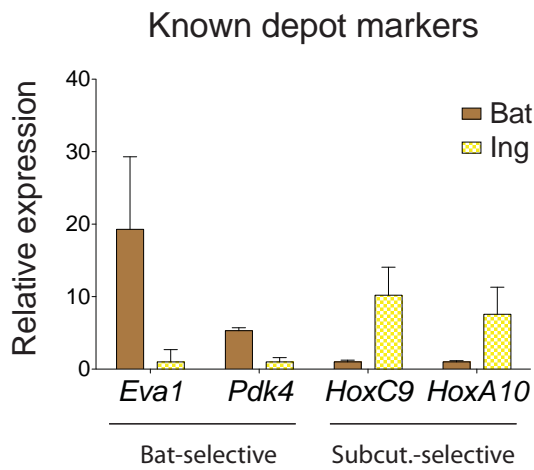**D**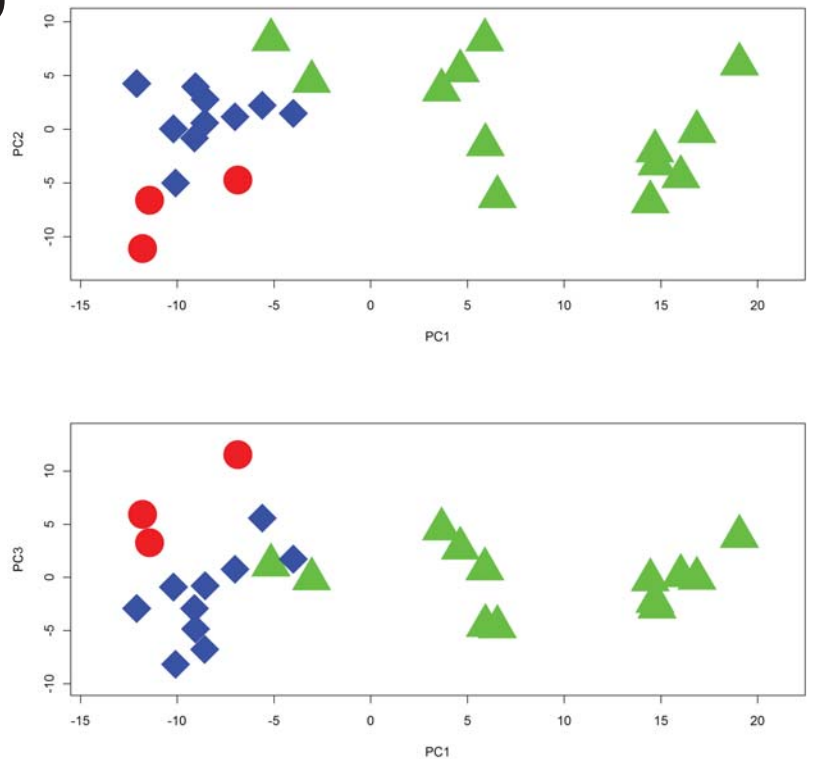

Supplement: NIHMS379454-supplement-02.pdf [file NIHMS379454-supplement-02.pdf]

**A.** Adipogenic genes

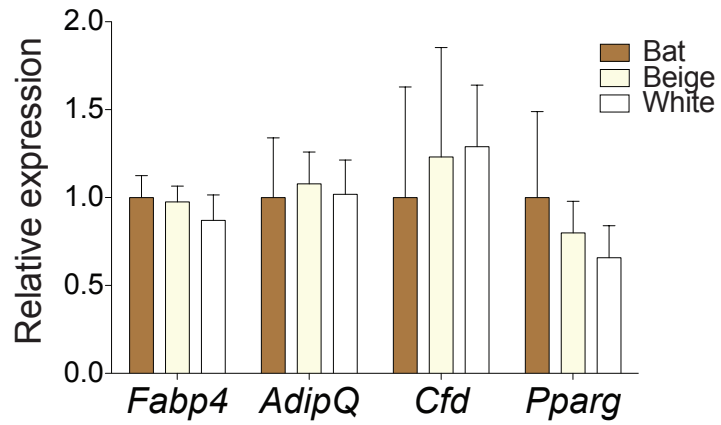

**B.** *Ucp-1*

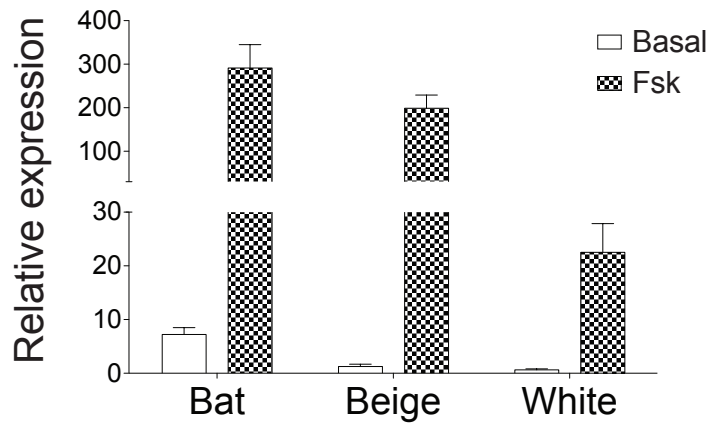

**C.** *Ucp-1*

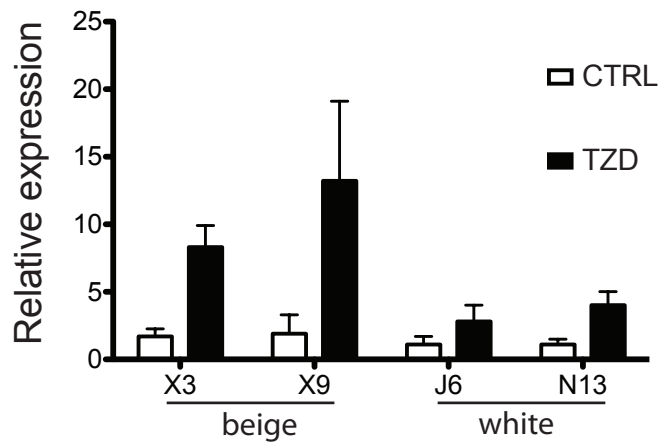

Supplement: NIHMS379454-supplement-03.pdf [file NIHMS379454-supplement-03.pdf]

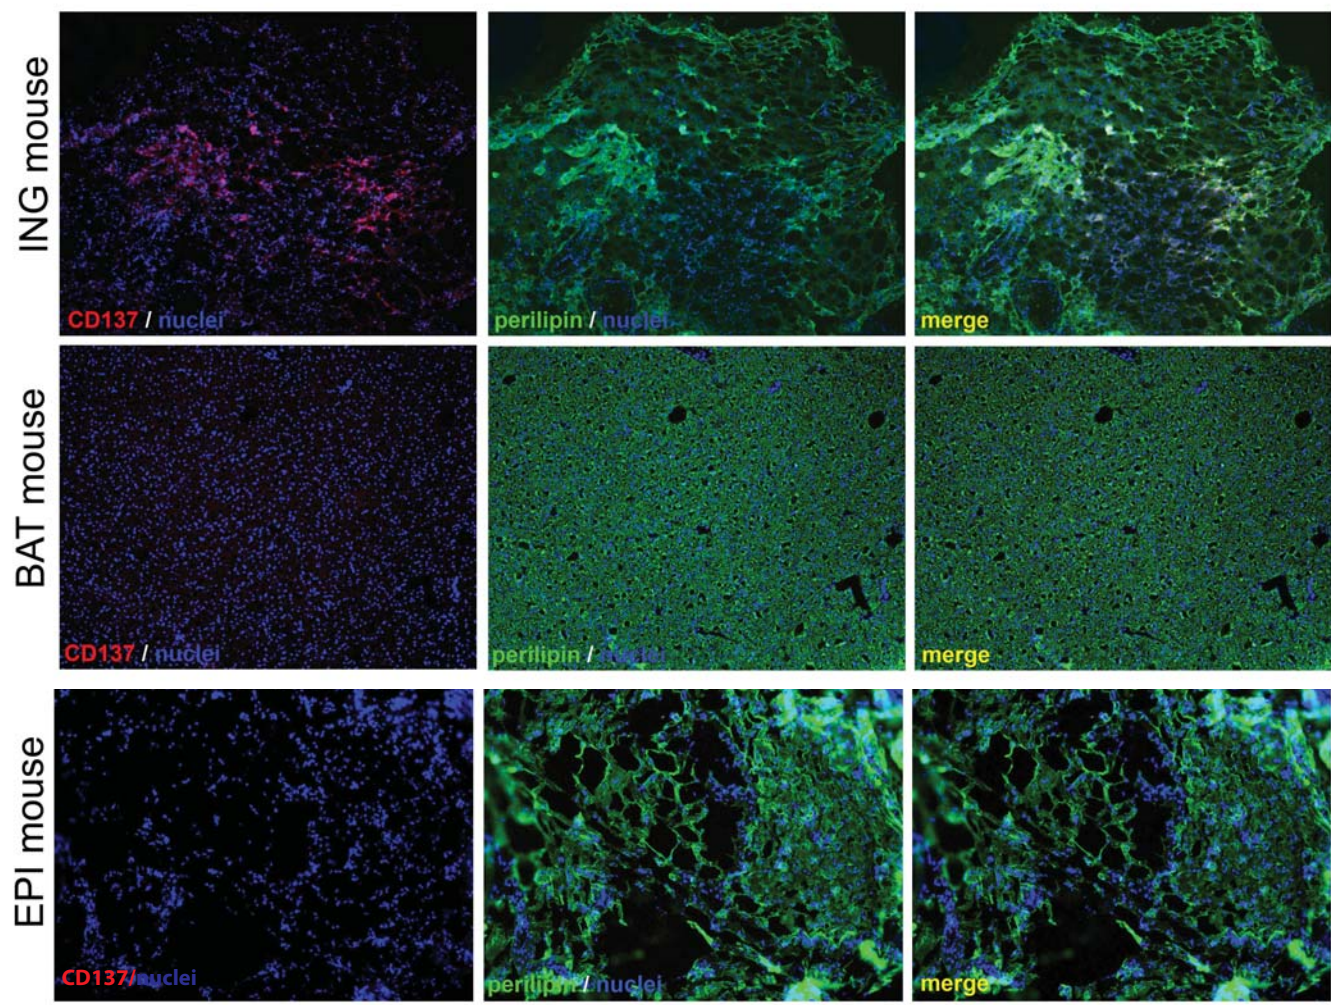

Supplement: NIHMS379454-supplement-04.pdf [file NIHMS379454-supplement-04.pdf]

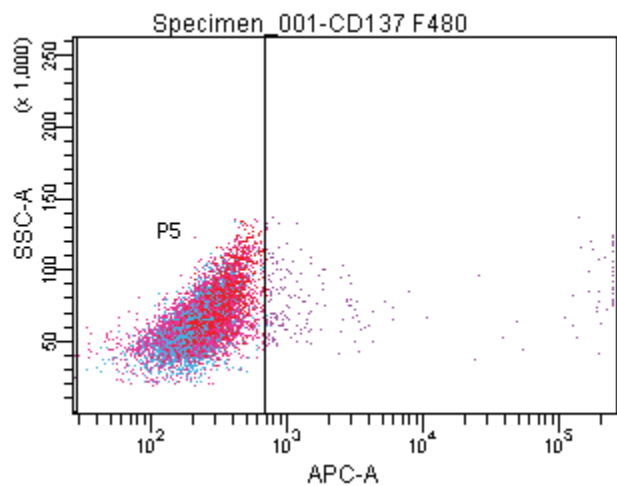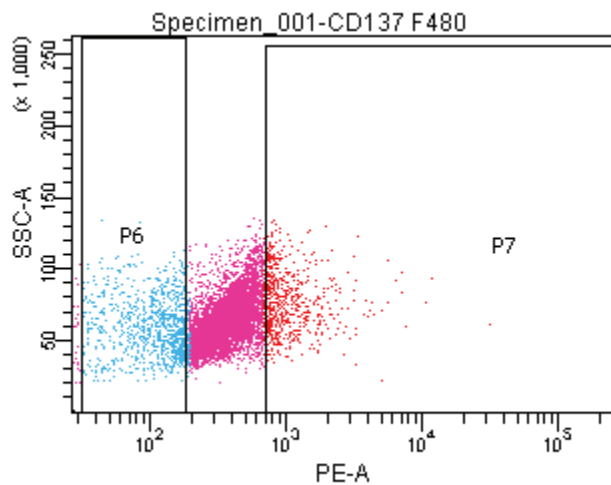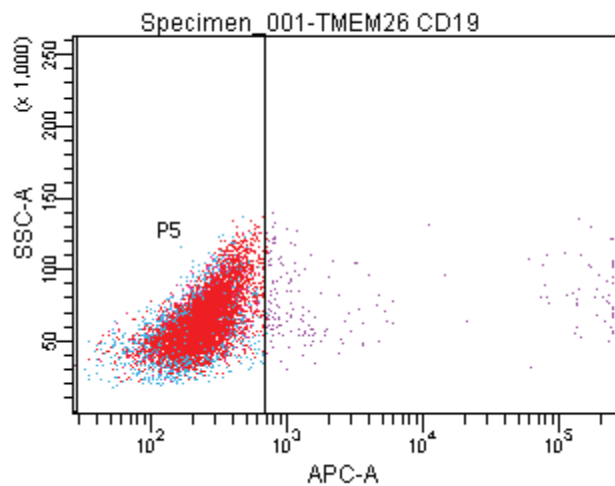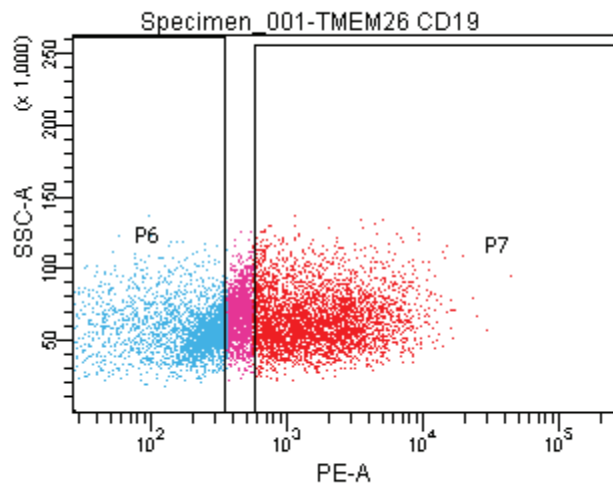

Supplement: NIHMS379454-supplement-05.pdf [file NIHMS379454-supplement-05.pdf]

A

### Beige-selective

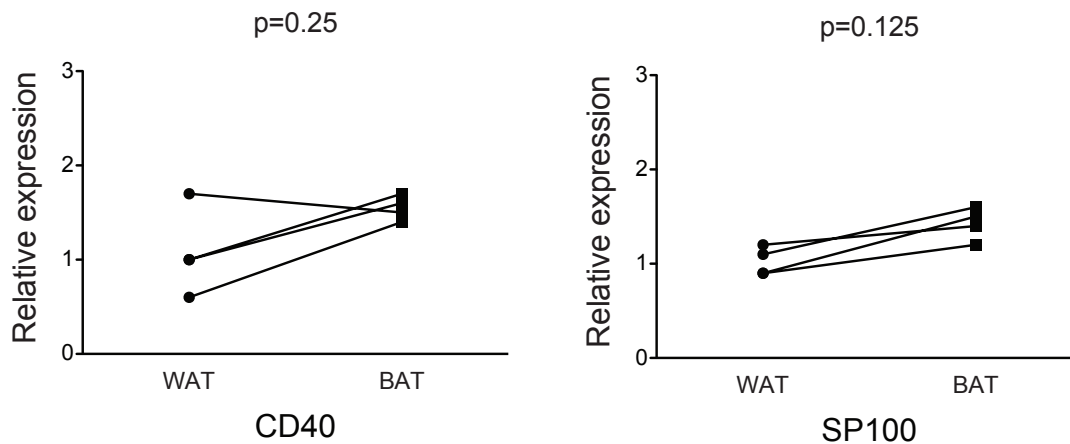

B

### Brown-selective

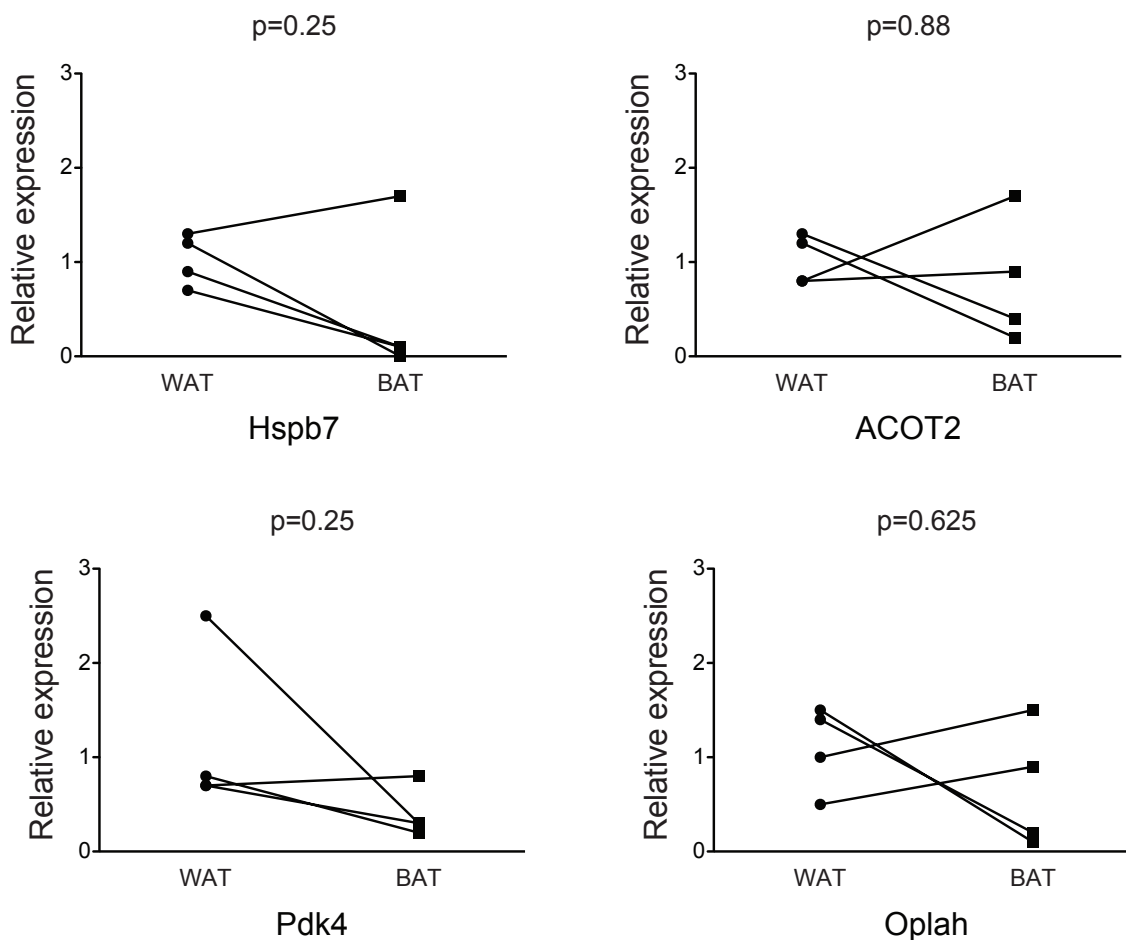

Supplement: NIHMS379454-supplement-06.pdf [file NIHMS379454-supplement-06.pdf]
